# Supplementary material for: WITHDRAWN: Symptom Clusters and Contemporary Symptom Networks among Women in Late Pregnancy: A Network Analysis
Source: Research Square preprint supplement (doi:10.21203/rs.3.rs-7858130/v1), 2025-11-25
Supplement: Supplementary file 1 [file 143d6d49eb2a55595eb2694c.docx]

Supplementary Table S1: Edge Weights in the Symptom Network Without Covariates

| symptom | s1 | s7 | s9 | s14 | s22 | s36 | s6 | s17 | s24 | s16 | s18 | s20 | s4 | s10 | s11 | s19 | s26 | s29 | s8 | s28 | S34 |
| --- | --- | --- | --- | --- | --- | --- | --- | --- | --- | --- | --- | --- | --- | --- | --- | --- | --- | --- | --- | --- | --- |
| s1 |  |  |  |  |  |  |  |  |  |  |  |  |  |  |  |  |  |  |  |  |  |
| s7 | 0.05 |  |  |  |  |  |  |  |  |  |  |  |  |  |  |  |  |  |  |  |  |
| s9 | 0.13 | 0.03 |  |  |  |  |  |  |  |  |  |  |  |  |  |  |  |  |  |  |  |
| s14 | 0.15 | 0.08 | 0.04 |  |  |  |  |  |  |  |  |  |  |  |  |  |  |  |  |  |  |
| s22 | 0.08 | 0.14 | 0.21 | 0.08 |  |  |  |  |  |  |  |  |  |  |  |  |  |  |  |  |  |
| s36 | 0.02 | 0.24 | - | 0.11 | 0.04 |  |  |  |  |  |  |  |  |  |  |  |  |  |  |  |  |
| s6 | - | - | - | - | - | 0.01 |  |  |  |  |  |  |  |  |  |  |  |  |  |  |  |
| s17 | 0.18 | - | - | 0.04 | - | - | 0.1 |  |  |  |  |  |  |  |  |  |  |  |  |  |  |
| s24 | 0.04 | - | - | - | 0.12 | 0.02 | 0.2 | 0.54 |  |  |  |  |  |  |  |  |  |  |  |  |  |
| s16 | 0.02 | - | 0.04 | - | - | 0.02 | 0.04 | 0.07 | 0.01 |  |  |  |  |  |  |  |  |  |  |  |  |
| s18 | 0.03 | 0.06 | - | - | 0.02 | 0.04 | 0.05 | - | 0.06 | 0.21 |  |  |  |  |  |  |  |  |  |  |  |
| s20 | 0.03 | - | 0.07 | - | 0.09 | - | 0.01 | - | - | 0.17 | 0.42 |  |  |  |  |  |  |  |  |  |  |
| s4 | 0.06 | 0.04 | - | 0.01 | - | 0.06 | 0.1 | - | - | 0.01 | 0.01 | 0.04 |  |  |  |  |  |  |  |  |  |
| s10 | 0.06 | - | 0.14 | - | - | 0.04 | - | 0.04 | - | 0.04 | 0.05 | - | 0.03 |  |  |  |  |  |  |  |  |
| s11 | - | 0.09 | - | - | - | - | 0.06 | - | 0.01 | 0.04 | 0.03 | - | 0.36 | 0.4 |  |  |  |  |  |  |  |
| s19 | - | - | 0.01 | 0.01 | - | - | - | 0.03 | - | - | 0.04 | 0.04 | 0.02 | - | - |  |  |  |  |  |  |
| s26 | 0.08 | 0.07 | 0.04 | 0.03 | 0.04 | 0.07 | 0.02 | 0.06 | 0.03 | - | - | - | - | - | - | 0.35 |  |  |  |  |  |
| s29 | - | - | - | 0.09 | - | 0.15 | 0.01 | - | 0.09 | - | - | 0.07 | - | - | - | 0.12 | 0.28 |  |  |  |  |
| s8 | 0.07 | - | 0.1 | 0.03 | - | - | 0.03 | -0.03 | - | - | 0.04 | - | - | 0.04 | - | - | 0.02 | 0.05 |  |  |  |
| s28 | - | - | - | - | - | - | - | - | - | 0.01 | - | - | - | - | - | - | 0.09 | 0.14 | 0.33 |  |  |
| s34 | 0.02 | - | - | - | 0.04 | 0.11 | - | 0.03 | - | 0.07 | 0.02 | - | - | - | - | - | - | 0.04 | 0.09 | 0.11 |  |

Note: "-" indicates no connection between the two nodes, s1=Fatigue，s7=Urinary frequency，s9=Difficulty falling asleep，s14=Body aches (pubic/lower back/hip, etc.)，s22=Frequent waking at night，s36=Bladder pressure，s6=Palpitations (rapid heartbeat)，s17=Shortness of breath/dyspnoea，s24=Chest tightness，s16=Irritability，s18=Anxiety，s20=Fear，s4=Gastric discomfort (e.g. acid reflux, burning sensation)，s10=Loss of appetite，s11=Nausea，s19=False labour contractions，s26=Abdominal tightness，s29=Pelvic heaviness，s8=Numbness or tingling in the hands/feet/legs，s28=Swelling in hands/feet，s34=Skin changes (e.g., pigmentation, roughness).

Supplementary Table S2: Edge Weights in the Symptom Network With Covariates

| symptom | s1 | s7 | s9 | s14 | s22 | s36 | s6 | s17 | s24 | s16 | s18 | s20 | s4 | s10 | s11 | s19 | s26 | s29 | s8 | s28 | s34 | v1 | v2 | v3 | v4 |
| --- | --- | --- | --- | --- | --- | --- | --- | --- | --- | --- | --- | --- | --- | --- | --- | --- | --- | --- | --- | --- | --- | --- | --- | --- | --- |
| s1 |  |  |  |  |  |  |  |  |  |  |  |  |  |  |  |  |  |  |  |  |  |  |  |  |  |
| s7 | 0.05 |  |  |  |  |  |  |  |  |  |  |  |  |  |  |  |  |  |  |  |  |  |  |  |  |
| s9 | 0.12 | 0.03 |  |  |  |  |  |  |  |  |  |  |  |  |  |  |  |  |  |  |  |  |  |  |  |
| s14 | 0.14 | 0.07 | 0.03 |  |  |  |  |  |  |  |  |  |  |  |  |  |  |  |  |  |  |  |  |  |  |
| s22 | 0.08 | 0.13 | 0.2 | 0.07 |  |  |  |  |  |  |  |  |  |  |  |  |  |  |  |  |  |  |  |  |  |
| s36 | 0.03 | 0.22 | - | 0.1 | 0.04 |  |  |  |  |  |  |  |  |  |  |  |  |  |  |  |  |  |  |  |  |
| s6 | - | - | - | - | - | - |  |  |  |  |  |  |  |  |  |  |  |  |  |  |  |  |  |  |  |
| s17 | 0.16 | - | - | 0.04 | 0.01 | - | 0.1 |  |  |  |  |  |  |  |  |  |  |  |  |  |  |  |  |  |  |
| s24 | 0.05 | - | - | - | 0.11 | 0.02 | 0.19 | 0.49 |  |  |  |  |  |  |  |  |  |  |  |  |  |  |  |  |  |
| s16 | 0.02 | - | 0.03 | - | - | 0.02 | 0.04 | 0.07 | 0.02 |  |  |  |  |  |  |  |  |  |  |  |  |  |  |  |  |
| s18 | 0.03 | 0.06 | - | - | 0.02 | 0.04 | 0.05 | - | 0.06 | 0.2 |  |  |  |  |  |  |  |  |  |  |  |  |  |  |  |
| s20 | 0.03 | - | 0.06 | - | 0.08 | - | 0.01 | - | - | 0.16 | 0.39 |  |  |  |  |  |  |  |  |  |  |  |  |  |  |
| s4 | 0.05 | 0.03 | - | 0.01 | - | 0.06 | 0.08 | - | - | 0.01 | 0.01 | 0.04 |  |  |  |  |  |  |  |  |  |  |  |  |  |
| s10 | 0.06 | - | 0.12 | - | - | 0.03 | - | 0.04 | - | 0.03 | 0.05 | - | 0.04 |  |  |  |  |  |  |  |  |  |  |  |  |
| s11 | - | 0.09 | - | - | - | - | 0.05 | - | 0.01 | 0.04 | 0.03 | - | 0.33 | 0.37 |  |  |  |  |  |  |  |  |  |  |  |
| s19 | - | - | - | - | - | - | - | 0.02 | - | - | 0.04 | 0.03 | - | - | - |  |  |  |  |  |  |  |  |  |  |
| s26 | 0.08 | 0.06 | 0.04 | 0.03 | 0.04 | 0.07 | 0.02 | 0.06 | 0.03 | - | - | - | - | - | - | 0.32 |  |  |  |  |  |  |  |  |  |
| s29 | - | - | - | 0.09 | - | 0.15 | 0.01 | - | 0.09 | - | - | 0.07 | - | - | - | 0.11 | 0.26 |  |  |  |  |  |  |  |  |
| s8 | 0.06 | - | 0.08 | 0.01 | - | - | 0.01 | - | - | - | 0.03 | - | - | 0.02 | - | - | 0.01 | 0.05 |  |  |  |  |  |  |  |
| s28 | - | - | - | - | - | - | - | - | - | - | - | - | - | - | - | - | 0.08 | 0.13 | 0.3 |  |  |  |  |  |  |
| s34 | 0.01 | - | - | - | 0.03 | 0.09 | - | 0.02 | - | 0.05 | 0.02 | - | - | - | - | - | - | 0.04 | 0.07 | 0.09 |  |  |  |  |  |
| v1 | - | - | - | - | - | - | - | - | - | - | -0.02 | -0.01 | - | - | - | - | - | - | - | - | - |  |  |  |  |
| v2 | - | - | - | - | - | - | - | - | - | - | - | - | - | - | - | - | - | - | - | - | - | - |  |  |  |
| v3 | - | - | - | - | - | - | - | - | - | - | - | 0.02 | - | - | - | 0.1 | - | 0.06 | - | - | - | - | - |  |  |
| v4 | - | 0.01 | - | - | - | - | - | - | - | - | - | - | - | - | - | - | - | - | - | - | - | - | - | - |  |

Note: "-" indicates no connection between the two nodes, s1=Fatigue，s7=Urinary frequency，s9=Difficulty falling asleep，s14=Body aches (pubic/lower back/hip, etc.)，s22=Frequent waking at night，s36=Bladder pressure，s6=Palpitations (rapid heartbeat)，s17=Shortness of breath/dyspnoea，s24=Chest tightness，s16=Irritability，s18=Anxiety，s20=Fear，s4=Gastric discomfort (e.g. acid reflux, burning sensation)，s10=Loss of appetite，s11=Nausea，s19=False labour contractions，s26=Abdominal tightness，s29=Pelvic heaviness，s8=Numbness or tingling in the hands/feet/legs，s28=Swelling in hands/feet，s34=Skin changes (e.g., pigmentation, roughness), v1= age, v2=physical activity, v3= gestational age, v4= pregnancy complications.
