# Supplementary material for: WITHDRAWN: Symptom Clusters and Contemporary Symptom Networks among Women in Late Pregnancy: A Network Analysis
Source: Research Square preprint supplement (doi:10.21203/rs.3.rs-7858130/v1), 2025-11-25
Supplement: Supplementary file 2 [file 86c6d7637ac8a7d0469df62e.docx]

Supplementary Table S3 Centrality indices of symptoms in the symptom network without covariates

| Symptom | Strength | Closeness | Betweenness | ExpectedInfluence |
| --- | --- | --- | --- | --- |
| s1 | 0.832 | 0.927 | -0.004 | 0.880 |
| s7 | -0.292 | 1.230 | 0.254 | -0.262 |
| s9 | -0.385 | 1.331 | 0.512 | -0.356 |
| s14 | -1.051 | -0.290 | -0.951 | -1.033 |
| s22 | -0.046 | 1.519 | -0.262 | -0.012 |
| s36 | 0.383 | 1.068 | 1.373 | 0.424 |
| s6 | -1.298 | -0.490 | -0.779 | -1.283 |
| s17 | 1.373 | 0.575 | -0.348 | 1.064 |
| s24 | 1.367 | 1.033 | 0.943 | 1.423 |
| s16 | -0.554 | -1.373 | -0.693 | -0.527 |
| s18 | 1.249 | -0.950 | -0.521 | 1.304 |
| s20 | 0.373 | -0.899 | -0.004 | 0.414 |
| s4 | -0.697 | -0.920 | -0.779 | -0.673 |
| s10 | -0.121 | -0.579 | -0.090 | -0.088 |
| s11 | 0.691 | -0.491 | -0.004 | 0.737 |
| s19 | -1.338 | -1.140 | -1.123 | -1.324 |
| s26 | 1.560 | 0.024 | 0.598 | 1.619 |
| s29 | 0.951 | 1.488 | 3.353 | 1.001 |
| s8 | -0.198 | -0.528 | -0.435 | -0.531 |
| s28 | -1.005 | -0.177 | -0.176 | -0.986 |
| s34 | -1.794 | -1.359 | -0.865 | -1.788 |

Note:s1=Fatigue, s7=Urinary frequency, s9=Difficulty falling asleep, s14=Body aches (pubic/lower back/hip, etc.), s22=Frequent waking at night, s36=Bladder pressure, s6=Palpitations (rapid heartbeat), s17=Shortness of breath/dyspnoea，s24=Chest tightness，s16=Irritability，s18=Anxiety, s20=Fear, s4=Gastric discomfort (e.g. acid reflux, burning sensation), s10=Loss of appetite, s11=Nausea, s19=False labour contractions, s26=Abdominal tightness, s29=Pelvic heaviness, s8=Numbness or tingling in the hands/feet/legs, s28=Swelling in hands/feet, s34=Skin changes (e.g., pigmentation, roughness).

Supplementary Table S4 Centrality indices of symptoms in the symptom network with covariates

| Symptom | Strength | Closeness | Betweenness | ExpectedInfluence |
| --- | --- | --- | --- | --- |
| s1 | 0.927 | 0.574 | -0.087 | 0.932 |
| s7 | 0.22 | 0.81 | 1.293 | 0.229 |
| s9 | 0.118 | 0.638 | 0.125 | 0.127 |
| s14 | -0.272 | 0.194 | -0.83 | -0.26 |
| s22 | 0.357 | 0.732 | -0.299 | 0.365 |
| s36 | 0.587 | 0.747 | 1.187 | 0.594 |
| s6 | -0.378 | 0.142 | -0.724 | -0.366 |
| s17 | 1.002 | 0.499 | -0.405 | 1.006 |
| s24 | 1.177 | 0.683 | 0.603 | 1.181 |
| s16 | 0.032 | -0.098 | -0.724 | 0.042 |
| s18 | 1.151 | 0.199 | 0.815 | 1.059 |
| s20 | 0.635 | 0.183 | 0.444 | 0.612 |
| s4 | -0.074 | -0.098 | -0.724 | -0.063 |
| s10 | 0.276 | 0.091 | -0.14 | 0.285 |
| s11 | 0.696 | 0.09 | -0.034 | 0.702 |
| s19 | -0.148 | 0.097 | 0.231 | -0.137 |
| s26 | 1.259 | 0.502 | 1.346 | 1.263 |
| s29 | 1.081 | 0.907 | 3.257 | 1.086 |
| s8 | -0.105 | -0.002 | -0.512 | -0.095 |
| s28 | -0.281 | 0.184 | -0.14 | -0.269 |
| s34 | -0.755 | -0.287 | -0.936 | -0.741 |
| v1 | -1.962 | -2.584 | -0.936 | -2.067 |
| v2 | -2.025 | NA | -0.936 | -2.004 |
| v3 | -1.512 | -0.898 | -0.936 | -1.494 |
| v4 | -2.007 | -3.309 | -0.936 | -1.987 |

Note: NA denotes an isolated node without connections to other nodes in the symptom network, for which centrality cannot be computed, s1=Fatigue, s7=Urinary frequency, s9=Difficulty falling asleep, s14=Body aches (pubic/lower back/hip, etc.), s22=Frequent waking at night, s36=Bladder pressure, s6=Palpitations (rapid heartbeat), s17=Shortness of breath/dyspnoea，s24=Chest tightness，s16=Irritability，s18=Anxiety, s20=Fear, s4=Gastric discomfort (e.g. acid reflux, burning sensation), s10=Loss of appetite, s11=Nausea, s19=False labour contractions, s26=Abdominal tightness, s29=Pelvic heaviness, s8=Numbness or tingling in the hands/feet/legs, s28=Swelling in hands/feet, s34=Skin changes (e.g., pigmentation, roughness), v1= age, v2=physical activity, v3= gestational age, v4= pregnancy complications.
