# Supplementary material for: WITHDRAWN: Symptom Clusters and Contemporary Symptom Networks among Women in Late Pregnancy: A Network Analysis
Source: Research Square preprint supplement (doi:10.21203/rs.3.rs-7858130/v1), 2025-11-25
Supplement: Supplementary file 3 [file 910fb469d47f37213a080fb9.docx]

**Supplementary File 1. Symptom Assessment Scale for Women in Late Pregnancy**

| **Section 1：**We have listed some symptoms below. Please read each item carefully. If you have had the symptom during this past week, indicate **how often** it occurred, **how severe** it was, and **how much distress or bother** it caused you by circling the appropriate number. If you did not have the symptom, make an **“x”** in the box marked **“DID NOT HAVE”**. | | | | | | | | | | | | | | |
| --- | --- | --- | --- | --- | --- | --- | --- | --- | --- | --- | --- | --- | --- | --- |
| **During the past week,**  did you have any of the following symptoms? | **DID NOT HAVE** | **If yes**，  How often did you have it | | | | **If yes，**  How severe was it usually | | | | **If yes，**  How much did it distress or bother you | | | | |
| **rarely** | **occasionally** | **frequently** | **almost constantly** | **slight** | **moderate** | **severe** | **very severe** | **not at all** | **a little bit** | **somewhat** | **quite a bit** | **very much** |
| Fatigue |  | 1 | 2 | 3 | 4 | 1 | 2 | 3 | 4 | 0 | 1 | 2 | 3 | 4 |
| Excessive sweating |  | 1 | 2 | 3 | 4 | 1 | 2 | 3 | 4 | 0 | 1 | 2 | 3 | 4 |
| Diarrhoea |  | 1 | 2 | 3 | 4 | 1 | 2 | 3 | 4 | 0 | 1 | 2 | 3 | 4 |
| Gastric discomfort (e.g. acid reflux, burning sensation) |  | 1 | 2 | 3 | 4 | 1 | 2 | 3 | 4 | 0 | 1 | 2 | 3 | 4 |
| Dizziness |  | 1 | 2 | 3 | 4 | 1 | 2 | 3 | 4 | 0 | 1 | 2 | 3 | 4 |
| Palpitations (rapid heartbeat) |  | 1 | 2 | 3 | 4 | 1 | 2 | 3 | 4 | 0 | 1 | 2 | 3 | 4 |
| Urinary frequency |  | 1 | 2 | 3 | 4 | 1 | 2 | 3 | 4 | 0 | 1 | 2 | 3 | 4 |
| Numbness or tingling in the hands/feet/legs |  | 1 | 2 | 3 | 4 | 1 | 2 | 3 | 4 | 0 | 1 | 2 | 3 | 4 |
| Difficulty falling asleep |  | 1 | 2 | 3 | 4 | 1 | 2 | 3 | 4 | 0 | 1 | 2 | 3 | 4 |
| Loss of appetite |  | 1 | 2 | 3 | 4 | 1 | 2 | 3 | 4 | 0 | 1 | 2 | 3 | 4 |
| Nausea |  | 1 | 2 | 3 | 4 | 1 | 2 | 3 | 4 | 0 | 1 | 2 | 3 | 4 |
| Constipation |  | 1 | 2 | 3 | 4 | 1 | 2 | 3 | 4 | 0 | 1 | 2 | 3 | 4 |
| Vomiting |  | 1 | 2 | 3 | 4 | 1 | 2 | 3 | 4 | 0 | 1 | 2 | 3 | 4 |
| Body aches (pubic /l ower back / hip, etc.) |  | 1 | 2 | 3 | 4 | 1 | 2 | 3 | 4 | 0 | 1 | 2 | 3 | 4 |
|  | | | | | | | | | | | | | | |
| **During the past week,**  did you have any of the following symptoms? | **DID NOT HAVE** | **If yes**，  How often did you have it | | | | **If yes，**  How severe was it usually | | | | **If yes，**  How much did it distress or bother you | | | | |
| **rarely** | **occasionally** | **frequently** | **almost constantly** | **slight** | **moderate** | **severe** | **very severe** | **not at all** | **a little bit** | **somewhat** | **quite a bit** | **very much** |
| Abdominal bloating |  | 1 | 2 | 3 | 4 | 1 | 2 | 3 | 4 | 0 | 1 | 2 | 3 | 4 |
| Irritability |  | 1 | 2 | 3 | 4 | 1 | 2 | 3 | 4 | 0 | 1 | 2 | 3 | 4 |
| Shortness of breath / dyspnoea |  | 1 | 2 | 3 | 4 | 1 | 2 | 3 | 4 | 0 | 1 | 2 | 3 | 4 |
| Anxiety |  | 1 | 2 | 3 | 4 | 1 | 2 | 3 | 4 | 0 | 1 | 2 | 3 | 4 |
| False labour contractions |  | 1 | 2 | 3 | 4 | 1 | 2 | 3 | 4 | 0 | 1 | 2 | 3 | 4 |
| Fear |  | 1 | 2 | 3 | 4 | 1 | 2 | 3 | 4 | 0 | 1 | 2 | 3 | 4 |
| Leg cramps |  | 1 | 2 | 3 | 4 | 1 | 2 | 3 | 4 | 0 | 1 | 2 | 3 | 4 |
| Frequent waking at night |  | 1 | 2 | 3 | 4 | 1 | 2 | 3 | 4 | 0 | 1 | 2 | 3 | 4 |
| Impaired memory |  | 1 | 2 | 3 | 4 | 1 | 2 | 3 | 4 | 0 | 1 | 2 | 3 | 4 |
| Chest tightness |  | 1 | 2 | 3 | 4 | 1 | 2 | 3 | 4 | 0 | 1 | 2 | 3 | 4 |

**Part 2: Symptom Assessment Scale for Women in Late Pregnancy (continued)**

| **Section 2：**We have listed some symptoms below. Please read each item carefully. If you have had the symptom during this past week, indicate how **severe** it was, and how much **distress or bother** it caused you by circling the appropriate number. If you did not have the symptom, make an **“x”** in the box marked **“DID NOT HAVE”**. | | | | | | | | | | |
| --- | --- | --- | --- | --- | --- | --- | --- | --- | --- | --- |
| **During the past week,**  did you have any of the following symptoms? | **DID NOT HAVE** | **If yes，**  How severe was it usually | | | | **If yes，**  How much did it distress or bother you | | | | |
| **slight** | **moderate** | **severe** | **very severe** | **not at all** | **a little bit** | **somewhat** | **quite a bit** | **very much** |
| Somnolence |  | 1 | 2 | 3 | 4 | 0 | 1 | 2 | 3 | 4 |
| Abdominal tightness |  | 1 | 2 | 3 | 4 | 0 | 1 | 2 | 3 | 4 |
| Gingival inflammation / bleeding |  | 1 | 2 | 3 | 4 | 0 | 1 | 2 | 3 | 4 |
| Swelling in hands / feet |  | 1 | 2 | 3 | 4 | 0 | 1 | 2 | 3 | 4 |
| Pelvic heaviness |  | 1 | 2 | 3 | 4 | 0 | 1 | 2 | 3 | 4 |
| Urinary leakage |  | 1 | 2 | 3 | 4 | 0 | 1 | 2 | 3 | 4 |
| Breast engorgement |  | 1 | 2 | 3 | 4 | 0 | 1 | 2 | 3 | 4 |
| Vaginal bulging / prolapse |  | 1 | 2 | 3 | 4 | 0 | 1 | 2 | 3 | 4 |
| Perineal swelling |  | 1 | 2 | 3 | 4 | 0 | 1 | 2 | 3 | 4 |
| Skin changes  (e.g., pigmentation, roughness) |  | 1 | 2 | 3 | 4 | 0 | 1 | 2 | 3 | 4 |
| difficulty urinating |  | 1 | 2 | 3 | 4 | 0 | 1 | 2 | 3 | 4 |
| Bladder pressure |  | 1 | 2 | 3 | 4 | 0 | 1 | 2 | 3 | 4 |
| Blood in stool/anal pain |  | 1 | 2 | 3 | 4 | 0 | 1 | 2 | 3 | 4 |
